# Supplementary material for: AcetoBase: a functional gene repository and database for formyltetrahydrofolate synthetase sequences
Source: Oxford University Press journal article supplement (doi:10.1093/database/baz142), 2019-01-01
Supplement: supplementary_figures_baz142.docx [file supplementary_figures_baz142.docx]

**Supplementary Figures**

**
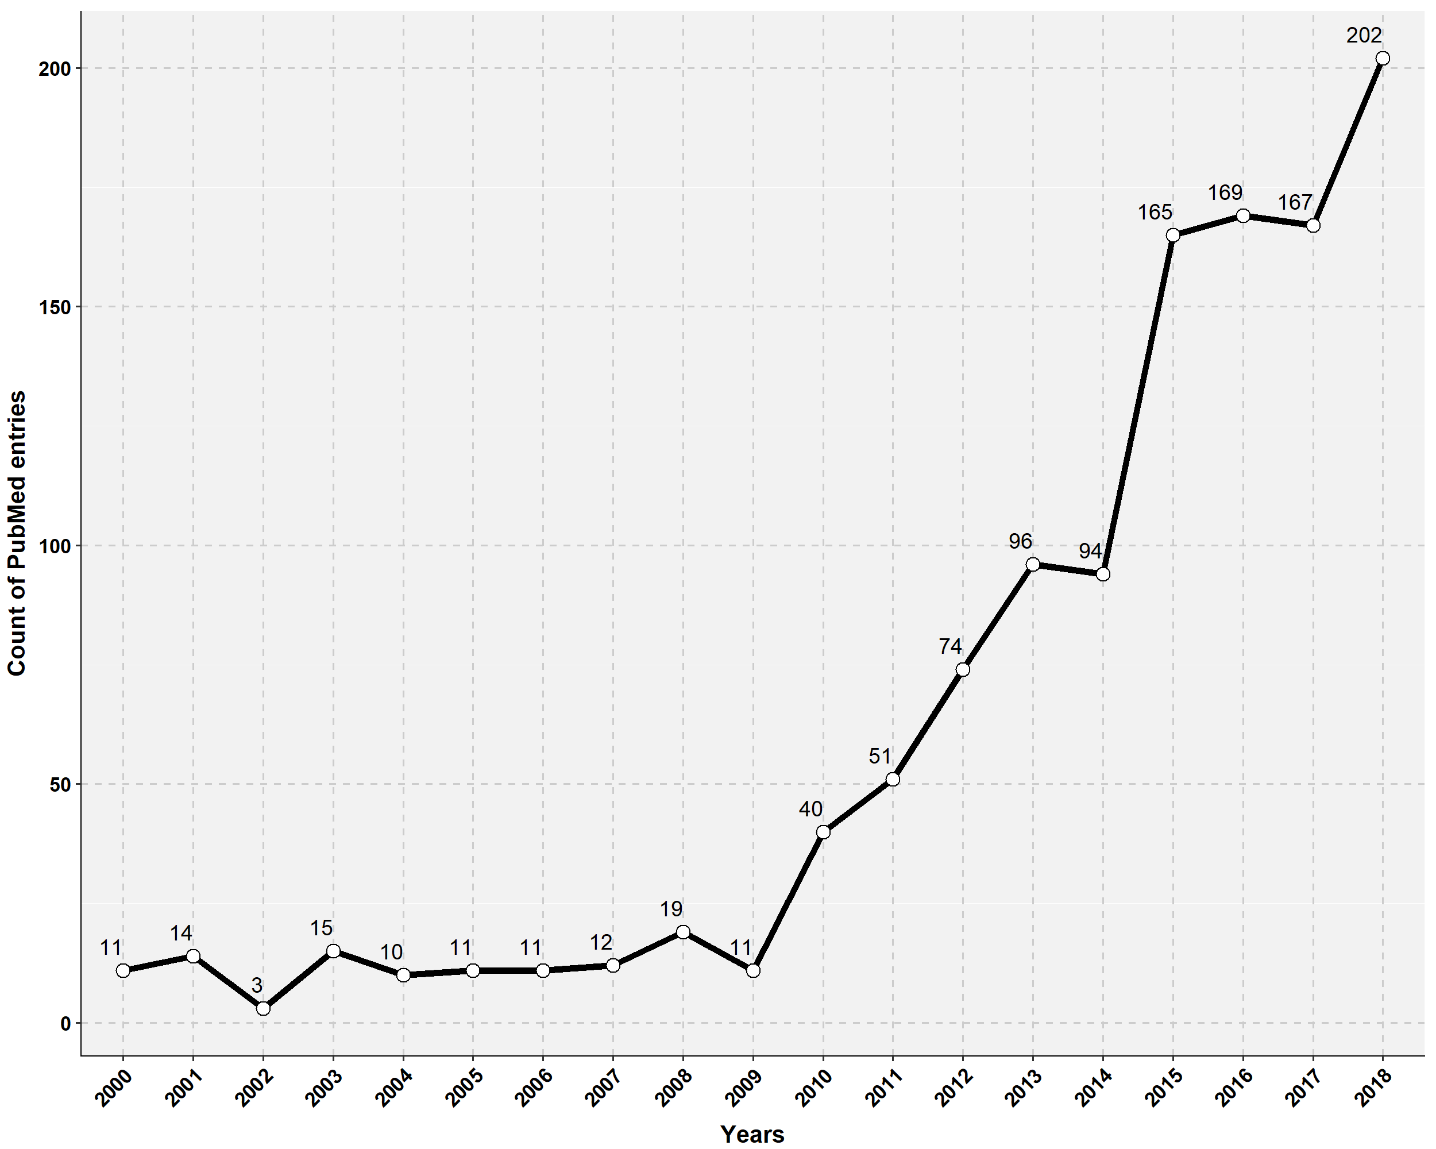
**

**Figure S1.** Number of studies per year dealing with acetogens or acetogenesis, 2000-2018. Values are number of articles indexed in the PubMed database (accessed July 2019).
